# Supplementary material for: The comparative plastisphere microbial community profile at Kung Wiman beach unveils potential plastic-specific degrading microorganisms
Source: PeerJ journal article supplement (doi:10.7717/peerj.17165), 2024-04-05

(1A) sample code 1.3

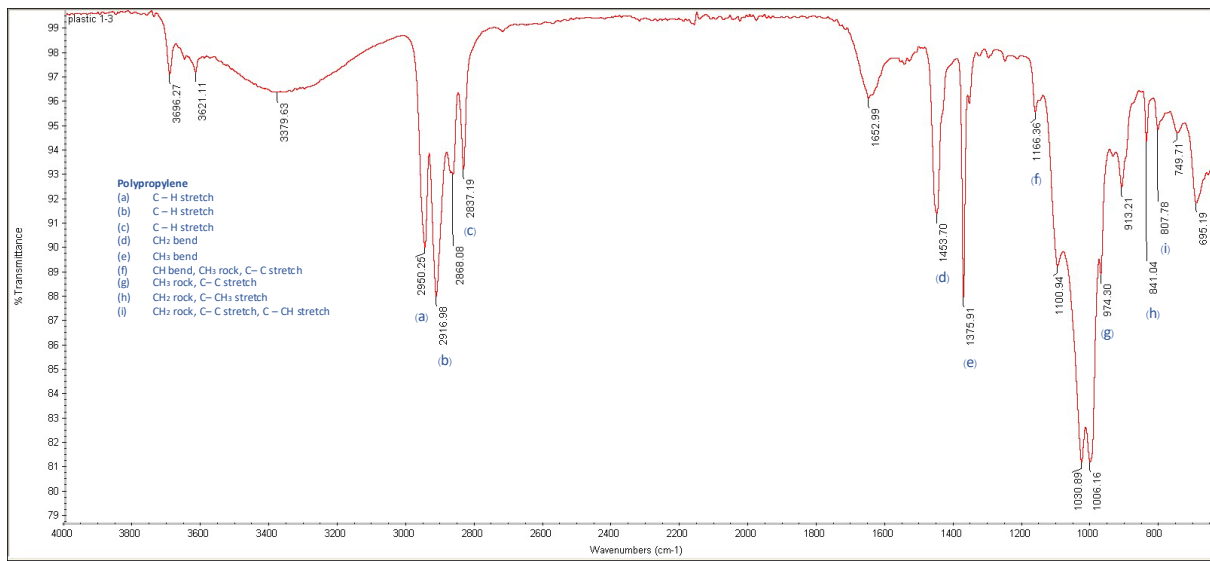

(2A) sample code 1.4

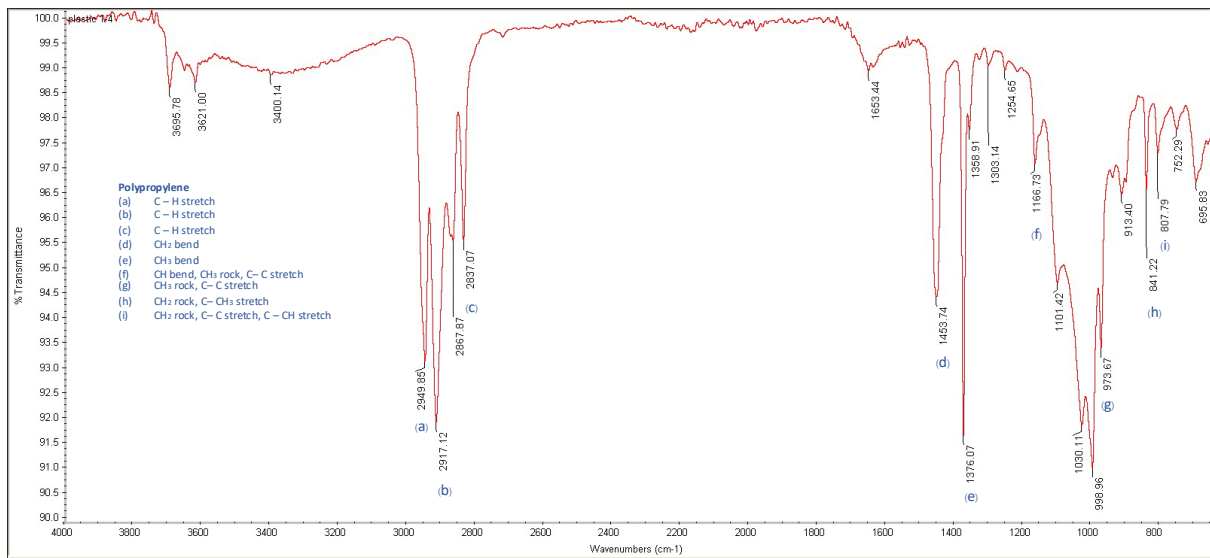

(3A) sample code 4.1

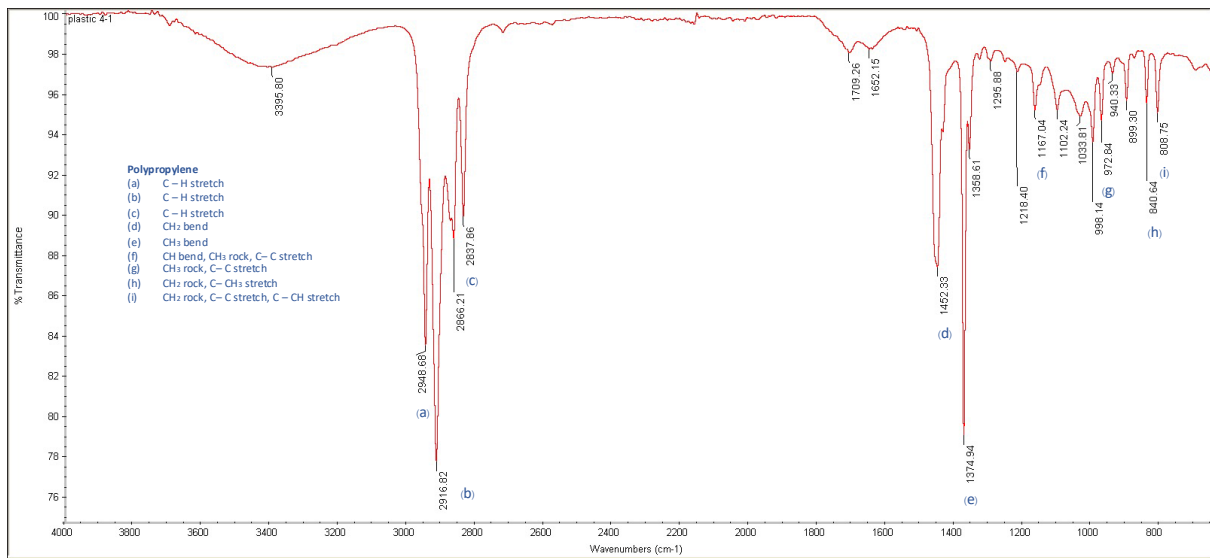

(4A) sample code 4.2

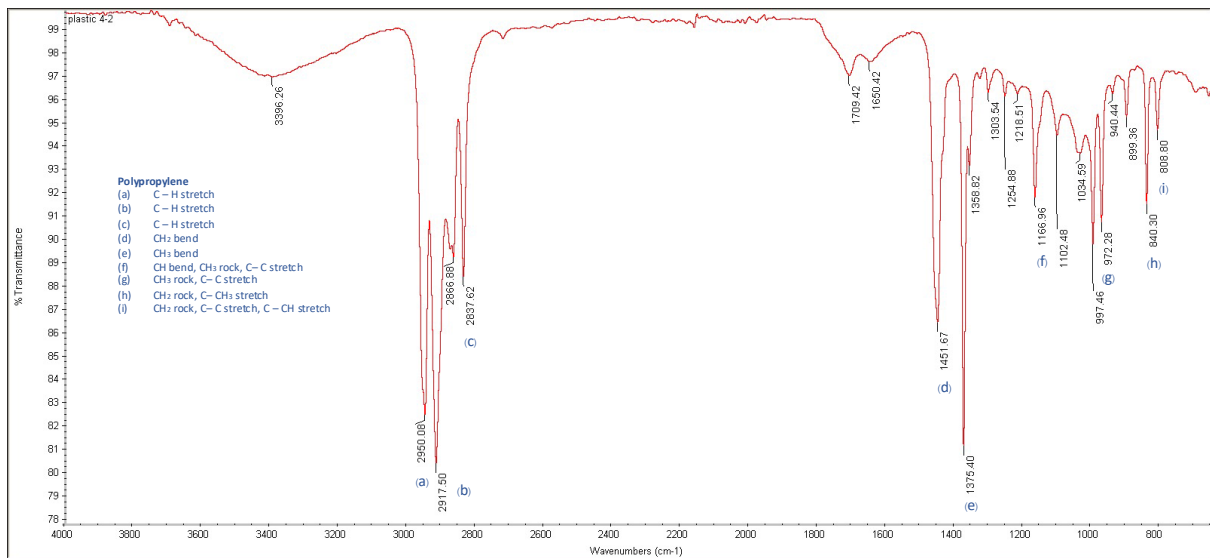

(5A) sample code 4.4

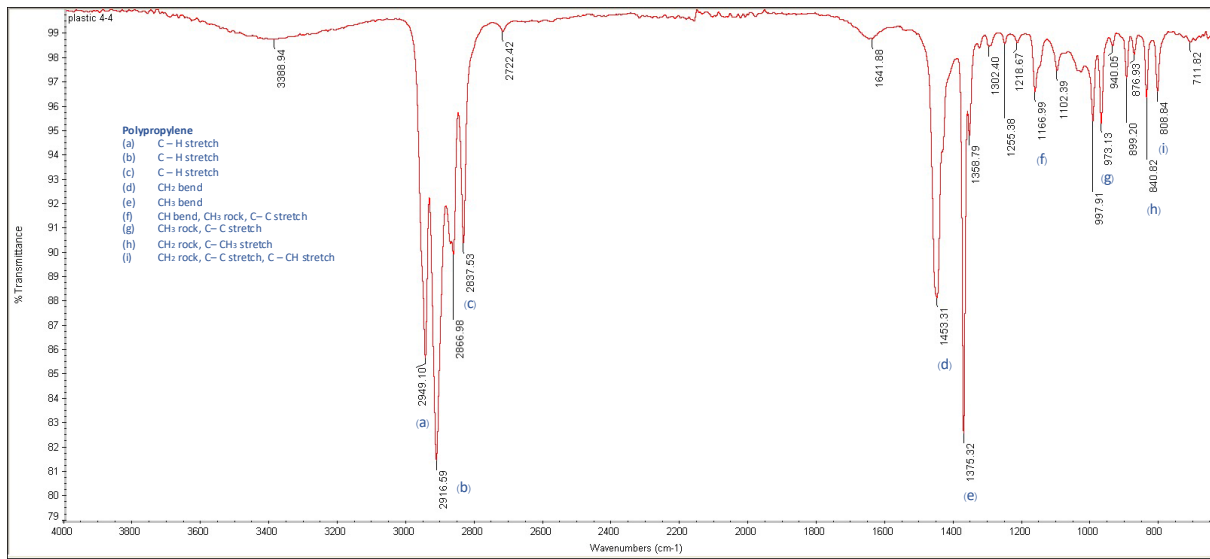

(1B) sample code 2.1

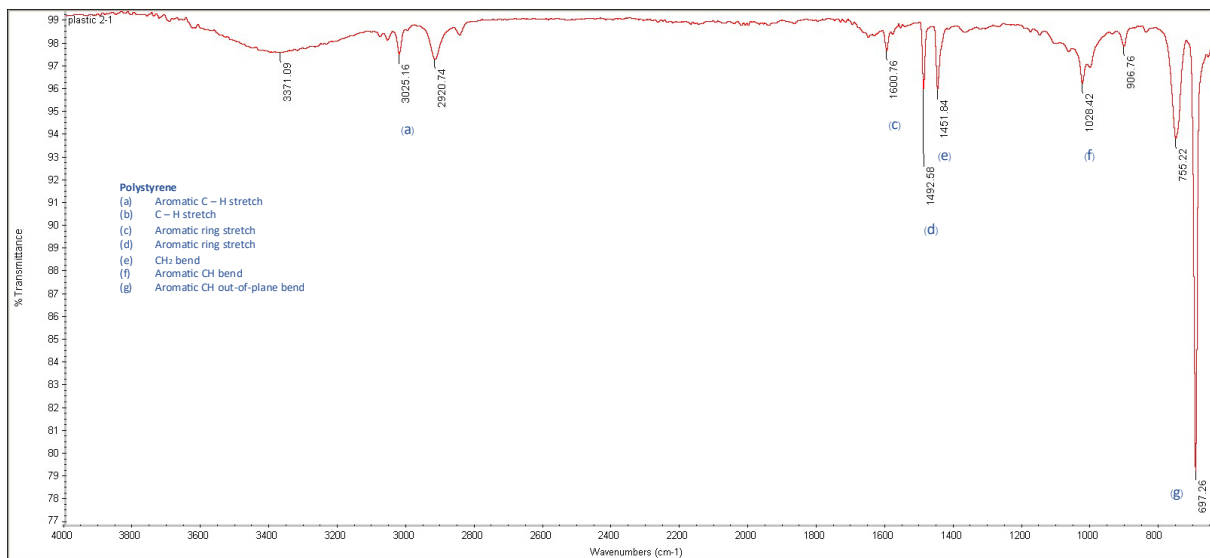

(2B) sample code 2.2

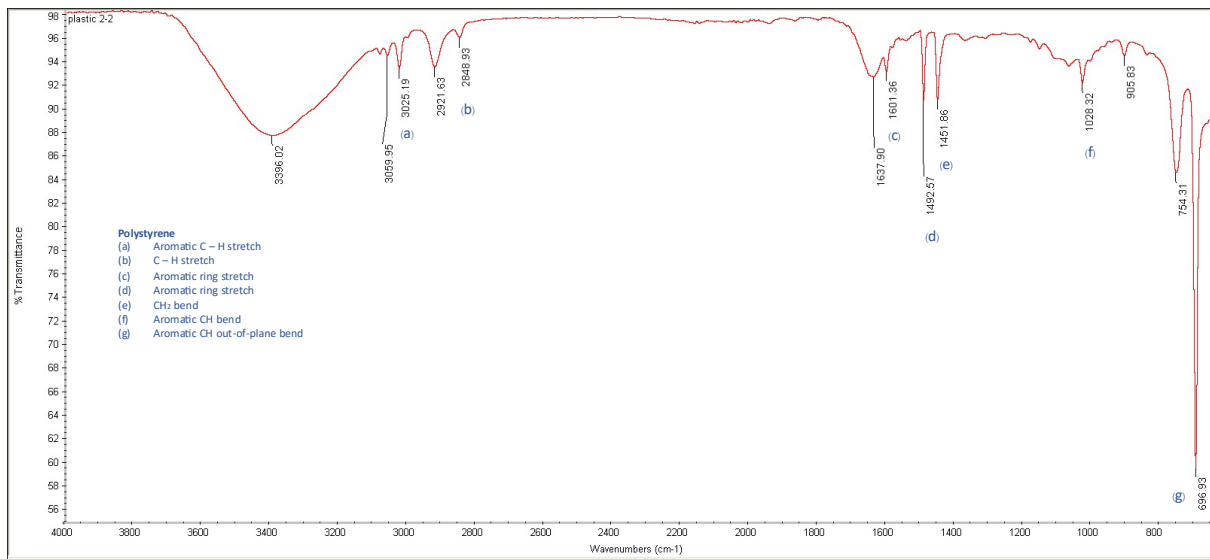

(3B) sample code 2.3

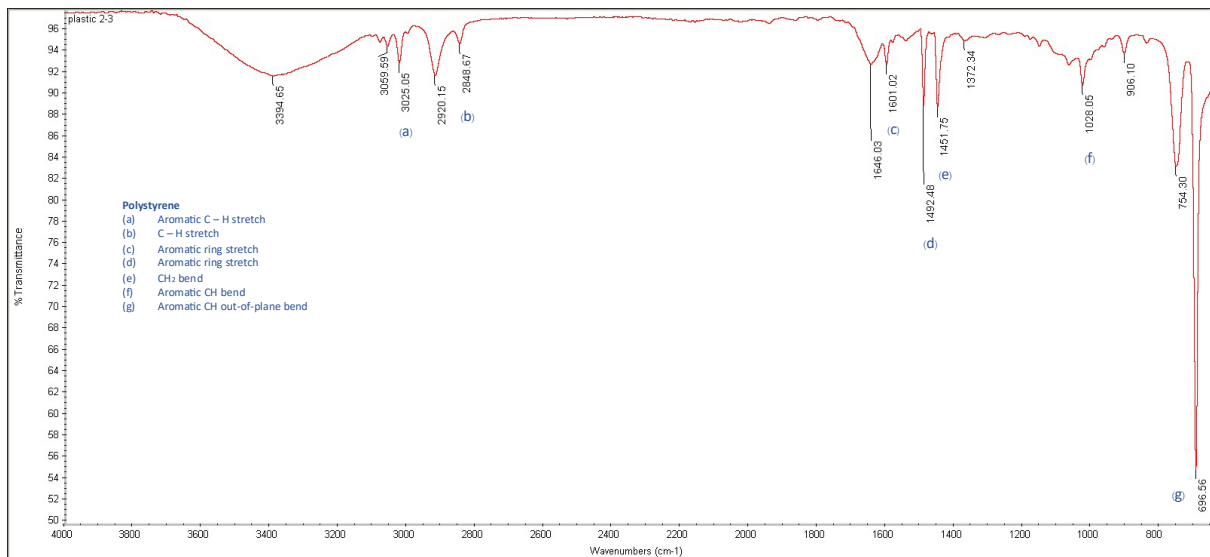

(4B) sample code 2.4

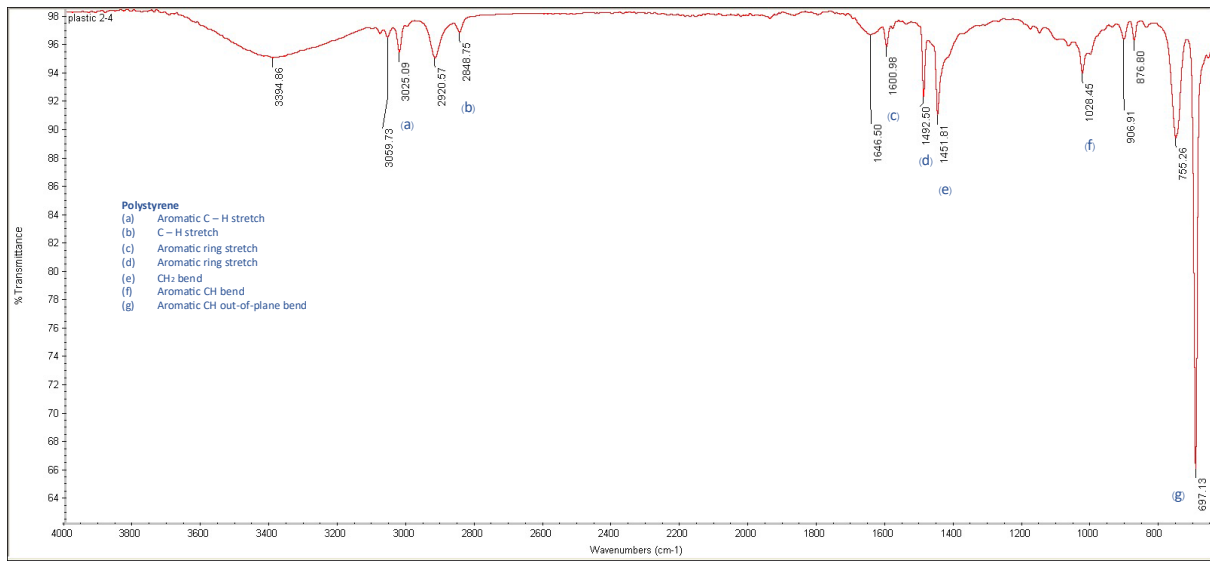

(1C) sample code 3.1

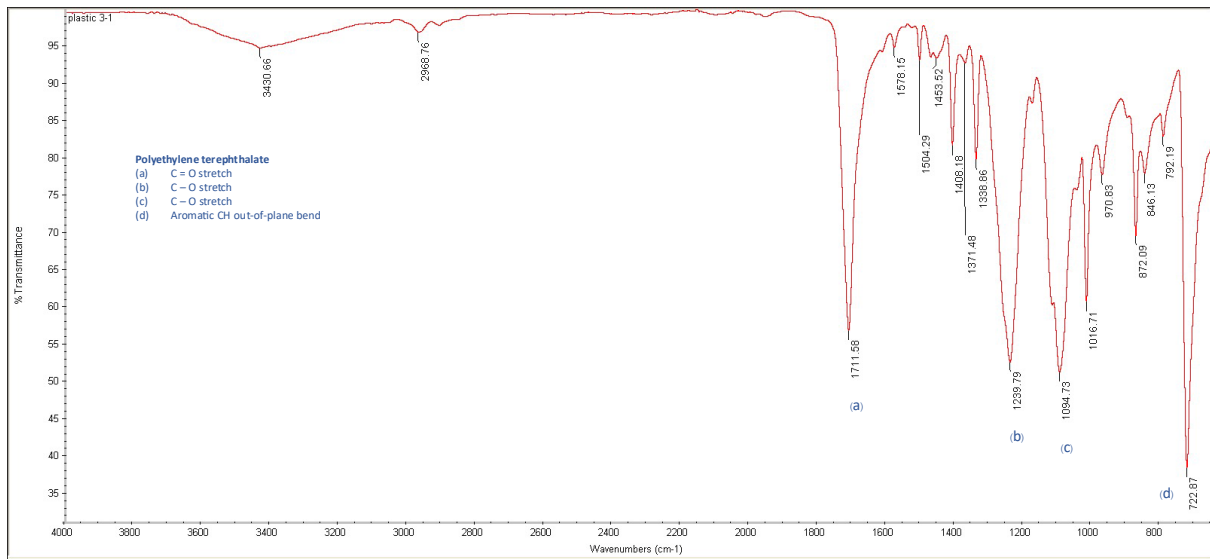

(2C) sample code 3.2

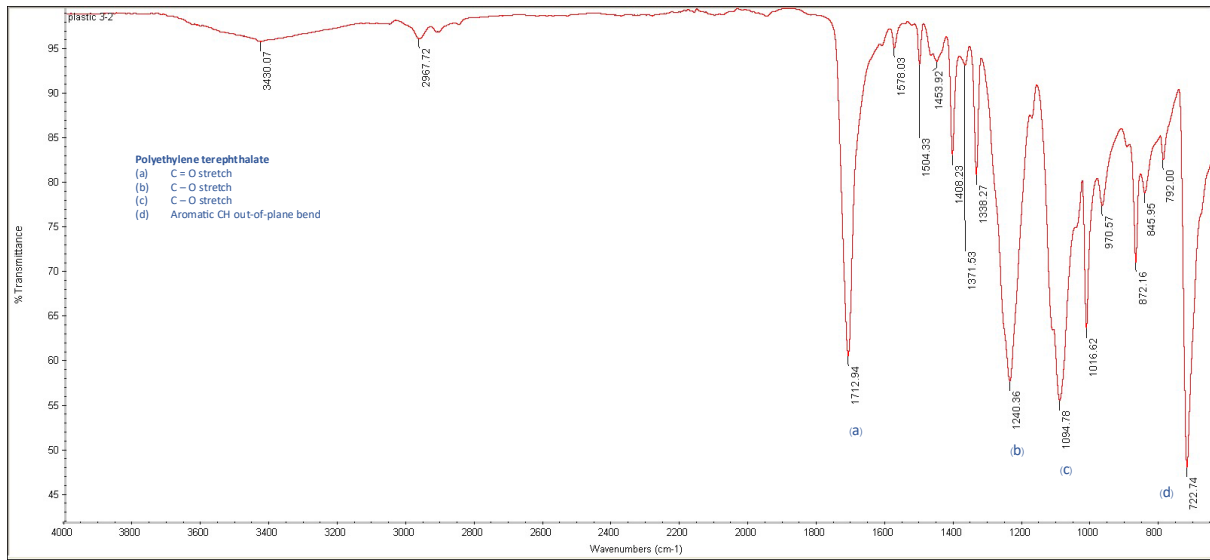

(3C) sample code 3.4

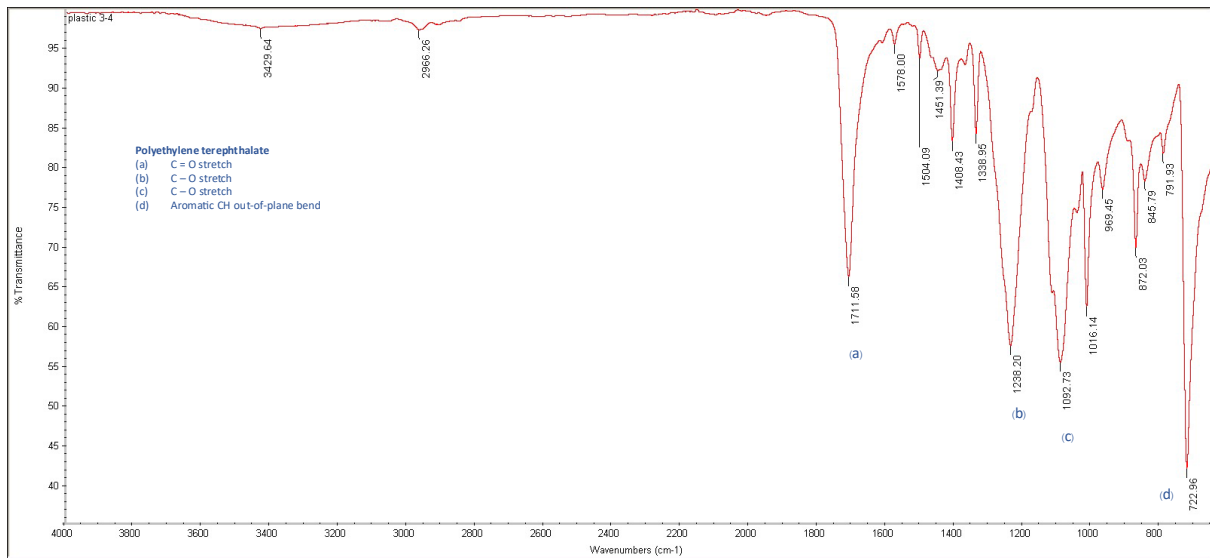

(4C) sample code 4.3

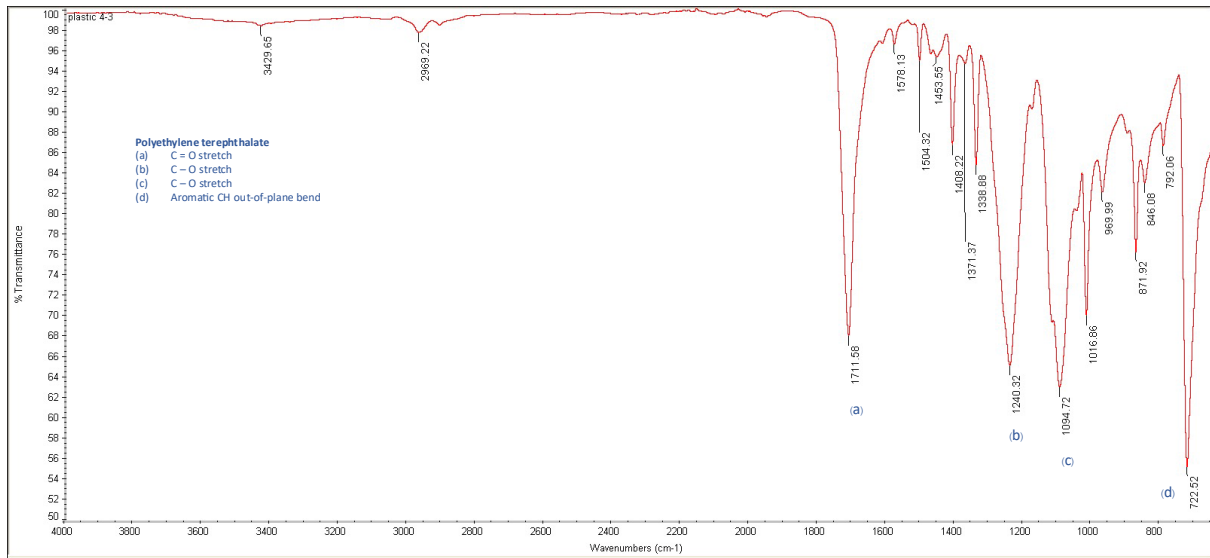

(1D) sample code 1.2

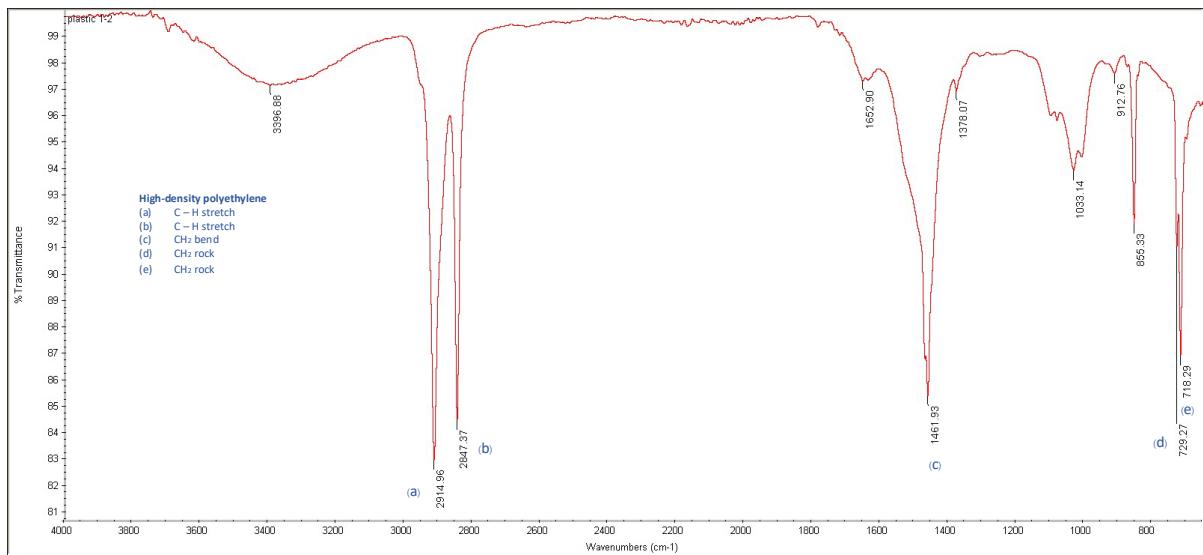

(2D) sample code 3.3

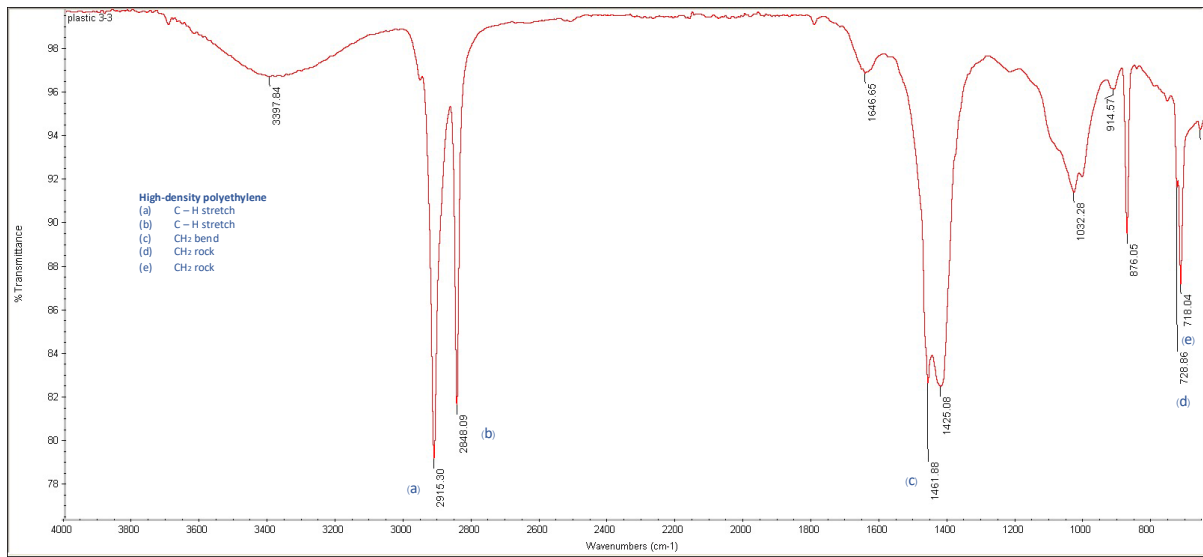

(E) sample code 1.1

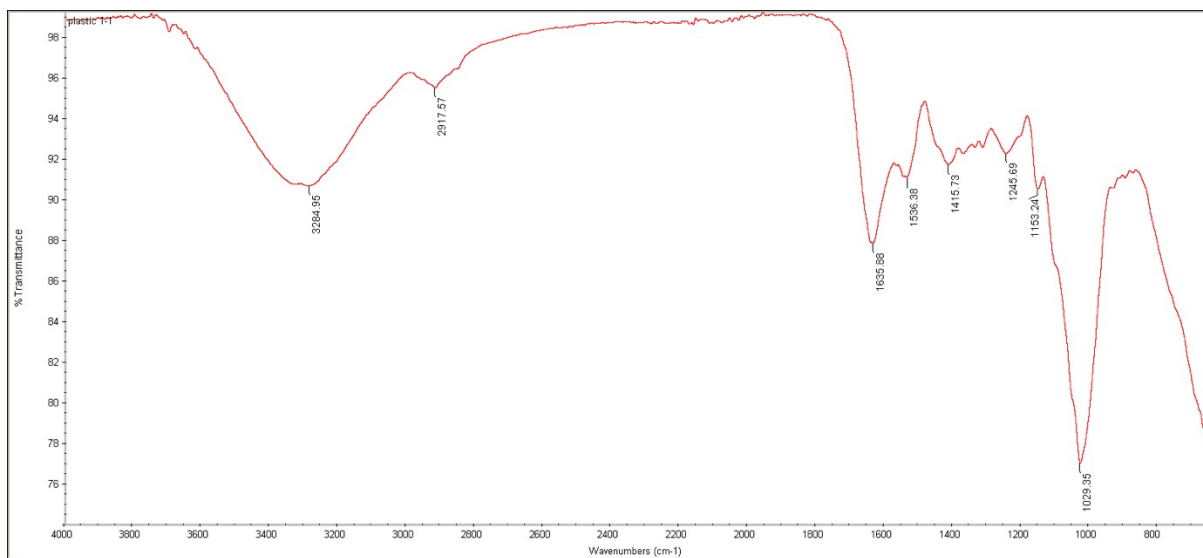

Supplement: FigS3.pdf [file FigS3.pdf]
