# Supplementary material for: The comparative plastisphere microbial community profile at Kung Wiman beach unveils potential plastic-specific degrading microorganisms
Source: PeerJ journal article supplement (doi:10.7717/peerj.17165), 2024-04-05

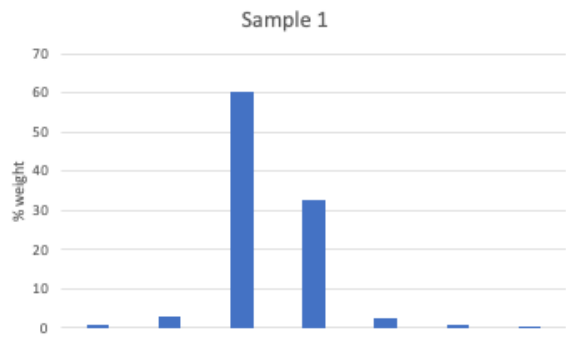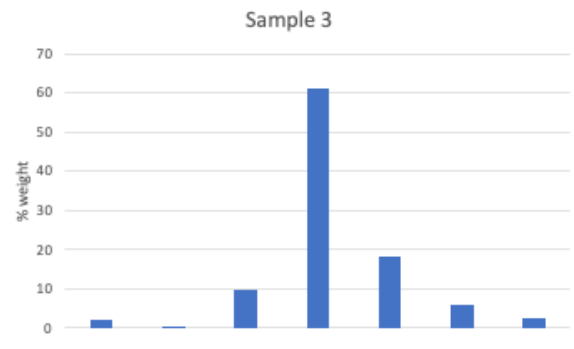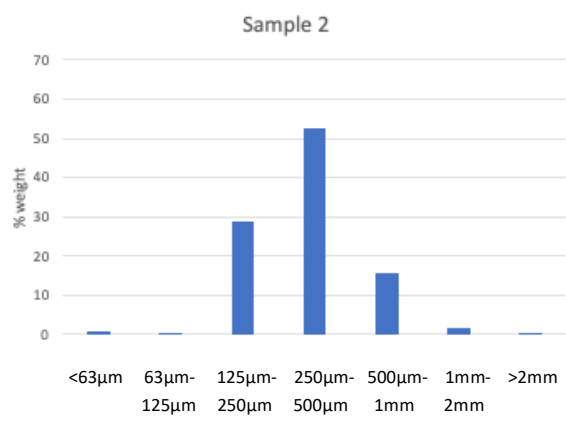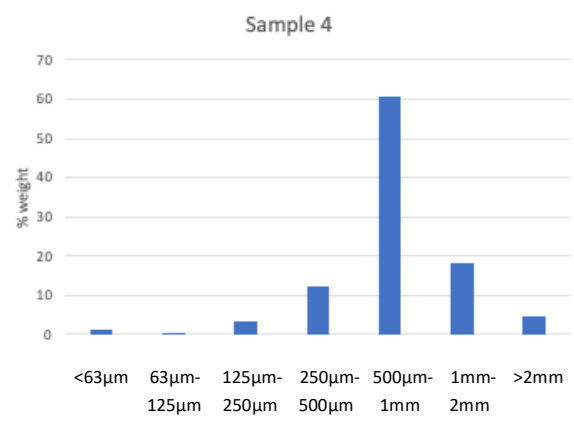

Supplement: FigS2.pdf [file FigS2.pdf]
